# Supplementary material for: La feria de La Adrada, una tradición ganadrera y cultural
Source: MDPI journal article supplement (doi:10.3390/polym15010248), 2008-01-01
Supplement: s1 [file s1]

# Supplementary Information: Controllable Preparation of Superparamagnetic Fe<sub>3</sub>O<sub>4</sub>@La(OH)<sub>3</sub> Inorganic Polymer for Rapid Adsorption and Separation of Phosphate

Yao Lu <sup>1</sup>, Xuna Jin <sup>1</sup>, Xiang Li <sup>2</sup>, Minpeng Liu <sup>1</sup>, Baolei Liu <sup>2</sup>, Xiaodan Zeng <sup>3</sup>, Jie Chen <sup>3</sup>, Zhigang Liu <sup>3,\*</sup>, Shihua Yu <sup>1,\*</sup> and Yucheng Xu <sup>4</sup>

<sup>1</sup> Jilin Institute of Chemical Technology, College of Chemical & Pharmaceutical Engineering, Jilin 132022, China

<sup>2</sup> Jilin Institute of Chemical Technology, School of Petrochemical Technology, Jilin 132022, China

<sup>3</sup> Jilin Institute of Chemical Technology, Centre of Analysis and Measurement, Jilin 132022, China

<sup>4</sup> Railway Transportation Department, Jilin Petrochemical Company, Jilin 132021, China

\* Correspondence: lzg@jict.edu.cn (Z.L.); ysh@jict.edu.cn (S.Y.)

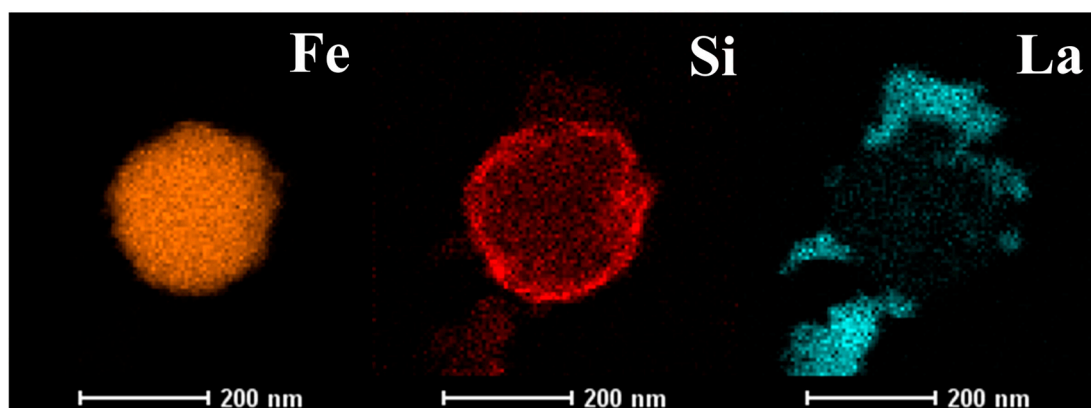

Figure S1 EDX elemental mapping of Fe<sub>3</sub>O<sub>4</sub>@La(OH)<sub>3</sub>.

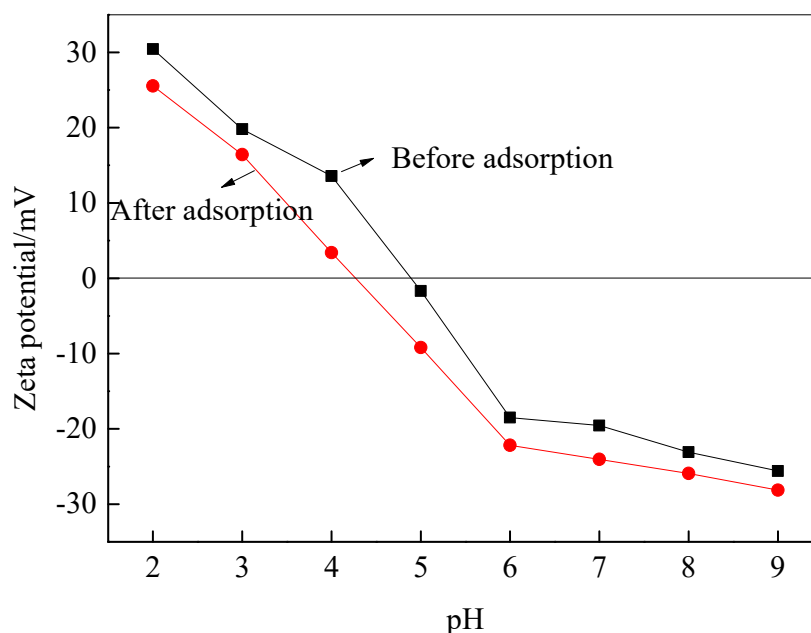

Figure S2 Zeta potential curves of Fe<sub>3</sub>O<sub>4</sub>@La(OH)<sub>3</sub> nanoparticles before (1) and after (2) the phosphate adsorption with the initial phosphate concentration of 30 mg/l.

Table S1 Comparison of phosphate adsorption capacities with other reported adsorbents.

| Adsorbent                                                               |  | equilibration<br>time | Adsorption<br>capacity                                           | Removal<br>rate                         | reference                                                       |
|-------------------------------------------------------------------------|--|-----------------------|------------------------------------------------------------------|-----------------------------------------|-----------------------------------------------------------------|
| Calcium silicate hydrate                                                |  | 120 min               | 65.42 mgPO <sub>4</sub> <sup>3-</sup> /gC-S-H)                   | >98%                                    | Journal of Environmental Management 301 (2022) 113923.          |
| alginate-like exopolymers                                               |  | 240 min               | 1.22±0.07 mg PO <sub>4</sub> <sup>3-</sup> -P/gTS <sub>ALE</sub> | 90.8%                                   | Bioresource Technology 333 (2021) 125167.                       |
| Fe <sub>3</sub> O <sub>4</sub> /Mg <sub>2</sub> Al-NO <sub>3</sub> -LDH |  | 2 h                   | 33.4 mgP/g                                                       | 58%(1.0 g/L)                            | Journal of Environmental Chemical Engineering 4 (2016) 984-991. |
| Fe <sub>3</sub> O <sub>4</sub> @ZrO <sub>2</sub>                        |  | 25 min                | 35.0 mgP/g                                                       | —                                       | Chemical Engineering Research and Design 145 (2019 ) 194–202.   |
| CS-Li@Fe <sub>3</sub> O <sub>4</sub>                                    |  | 50 min                | 95.5 mgP/g (200 mg/L)                                            | 98%, at low phosphate concentration-ion | Biochemical Engineering Journal 187 (2022) 108662.              |
| Fe <sub>3</sub> O <sub>4</sub> @La(OH) <sub>3</sub>                     |  | 20 min                | 63.72 mg P/g (30 mg/L)                                           | >95.7%                                  | This work                                                       |
